# Supplementary material for: Multicentre validation of a sepsis prediction algorithm using only vital sign data in the emergency department, general ward and ICU
Source: PubMed Central journal article supplement — BMJ Open. 2018 Jan 26;8(1):e017833. doi: 10.1136/bmjopen-2017-017833 (PMC5829820; doi:10.1136/bmjopen-2017-017833), 2018-01-26
Supplement: bmjopen-2017-017833supp001.pdf [file bmjopen-2017-017833supp001.pdf]

**Supplementary Table 1.** Inclusion flowcharts for Stanford Medical Center, Oroville Hospital, Bakersfield Heart Hospital, and Cape Regional Medical Center.

|                                                                                    | <b>Stanford</b> | <b>Oroville</b> | <b>BHH</b> | <b>CRMC</b> |
|------------------------------------------------------------------------------------|-----------------|-----------------|------------|-------------|
| <b>Total encounters</b>                                                            | 521,040         | 1,200           | 5,681      | 4,637       |
| <b>Inpatients Only</b>                                                             | 441,208         | 1,200           | 5,305      | 4,631       |
| <b>Patients Aged <math>\geq 18</math></b>                                          | 358,017         | 1,150           | 5,272      | 4,510       |
| <b>Patients with <math>\geq 1</math> observation of each required measurement*</b> | 239,767         | 1,140           | 2,231      | 4,295       |
| <b>Patients with prediction time between 7 and 2000 hours</b>                      | 239,767         | 1,140           | 2,231      | 4,295       |

\*required measurements include heart rate, respiratory rate, peripheral oxygen saturation (SpO<sub>2</sub>), temperature, systolic blood pressure, and diastolic blood pressure.

**Supplementary Table 2.** Demographic information for Stanford Medical Center, Oroville Hospital, Bakersfield Heart Hospital, and Cape Regional Medical Center.

| <b>Demographic Overview</b>                                                                                                                                    | <b>Characteristic</b> | <b>Stanford (%)</b> | <b>Oroville (%)</b> | <b>BHH (%)</b> | <b>CRMC (%)</b> |
|----------------------------------------------------------------------------------------------------------------------------------------------------------------|-----------------------|---------------------|---------------------|----------------|-----------------|
| <b>Gender</b>                                                                                                                                                  | Female                | 53.91               | 54.87               | 45.94          | 52.30           |
|                                                                                                                                                                | Male                  | 46.09               | 45.13               | 54.06          | 47.70           |
| <b>Age</b><br><br><b>Median Ages</b><br><b>Stanford: 53</b><br><b>UCSF: 55</b><br><b>BIDMC: 65</b><br><b>Oroville: 61</b><br><b>BHH: 60</b><br><b>CRMC: 68</b> | 18-29                 | 16.75               | 7.74                | 8.54           | 3.93            |
|                                                                                                                                                                | 30-39                 | 13.28               | 9.22                | 10.52          | 4.90            |
|                                                                                                                                                                | 40-49                 | 14.50               | 10.43               | 12.79          | 8.28            |
|                                                                                                                                                                | 50-59                 | 18.20               | 19.39               | 17.53          | 15.75           |
|                                                                                                                                                                | 60-69                 | 17.71               | 20.96               | 18.47          | 20.55           |
|                                                                                                                                                                | 70+                   | 19.56               | 32.26               | 32.15          | 46.60           |
| <b>Length of Stay (days)</b>                                                                                                                                   | 0-2                   | 71.51               | 97.33               | 63.42          | 21.42           |
|                                                                                                                                                                | 3-5                   | 15.53               | 34.17               | 11.07          | 7.17            |
|                                                                                                                                                                | 6-8                   | 5.53                | 6.667               | 4.80           | 2.37            |
|                                                                                                                                                                | 9+                    | 7.43                | 8.50                | 20.71          | 69.03           |
| <b>Death During Hospital Stay</b>                                                                                                                              | Yes                   | 1.91                | N/A                 | N/A            | 1.21            |
|                                                                                                                                                                | No                    | 98.09               | N/A                 | N/A            | 98.79           |

**Supplementary Table 3.** Confusion matrix of ten-fold cross validation results, using all features. Values in the table represent averages  $\pm$  standard deviations.

**Sepsis:**

|                 | Predicted Positive | Predicted Negative |
|-----------------|--------------------|--------------------|
| Actual Positive | 17109 $\pm$ 424    | 774 $\pm$ 424      |
| Actual Negative | 30 $\pm$ 2         | 110 $\pm$ 2        |

**Severe Sepsis:**

|                 | Predicted Positive | Predicted Negative |
|-----------------|--------------------|--------------------|
| Actual Positive | 15322 $\pm$ 369    | 2531 $\pm$ 369     |
| Actual Negative | 48 $\pm$ 4         | 171 $\pm$ 4        |

**Septic Shock:**

|                 | Predicted Positive | Predicted Negative |
|-----------------|--------------------|--------------------|
| Actual Positive | 18801 $\pm$ 9      | 19 $\pm$ 9         |
| Actual Negative | 67 $\pm$ 3         | 265 $\pm$ 3        |

**Supplementary Table 4.** Confusion matrix of ten-fold cross validation results, with gold standard definition associated inputs removed. Values in the table represent averages  $\pm$  standard deviations.

**Sepsis:**

|                 | Predicted Positive | Predicted Negative |
|-----------------|--------------------|--------------------|
| Actual Positive | 13655 $\pm$ 488    | 4231 $\pm$ 488     |
| Actual Negative | 34 $\pm$ 3         | 120 $\pm$ 3        |

**Severe Sepsis:**

|                 | Predicted Positive | Predicted Negative |
|-----------------|--------------------|--------------------|
| Actual Positive | 13855 $\pm$ 2381   | 4015 $\pm$ 2381    |
| Actual Negative | 72 $\pm$ 25        | 147 $\pm$ 25       |

**Septic Shock:**

|                 | Predicted Positive | Predicted Negative |
|-----------------|--------------------|--------------------|
| Actual Positive | 17972 $\pm$ 320    | 878 $\pm$ 320      |
| Actual Negative | 66 $\pm$ 0         | 260 $\pm$ 0        |

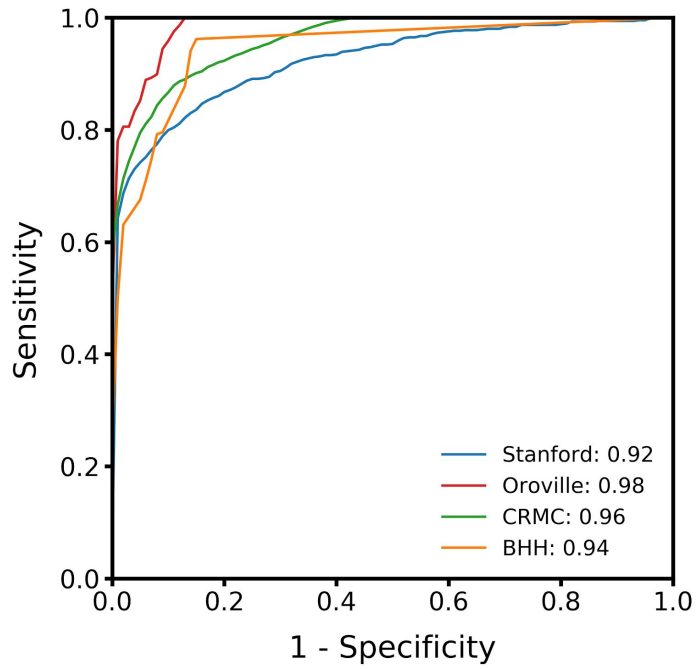

**Figure 1.** ROC curves for *InSight* at time of severe sepsis onset on data from Stanford, Oroville, Cape Regional Medical Center (CRMC), and Bakersfield Heart Hospital (BHH).

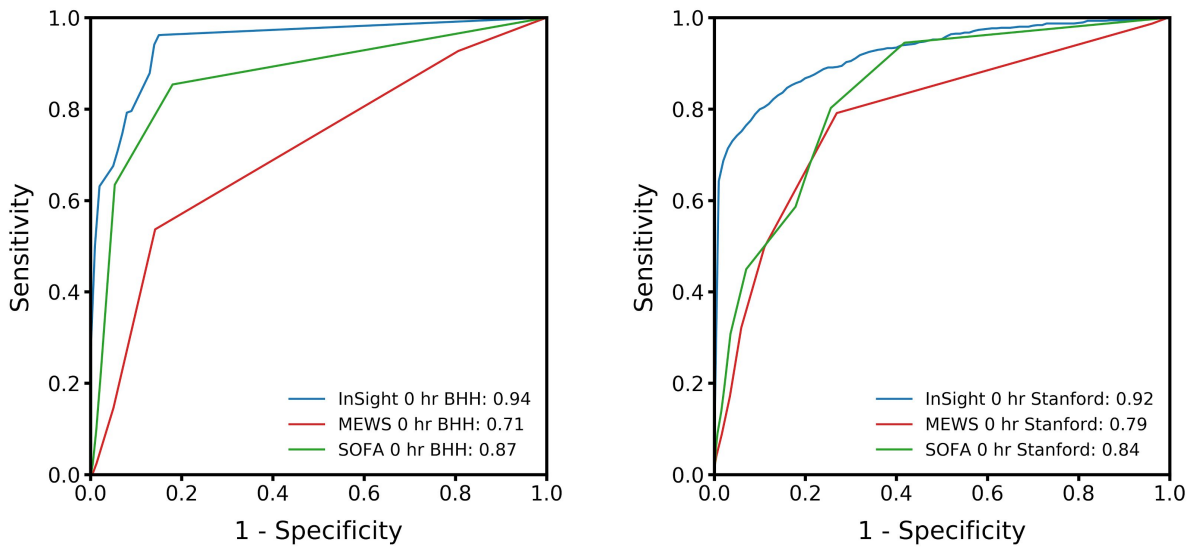

**Supplementary Figure 2.** ROC curves for *InSight*, MEWS, and SOFA applied to severe sepsis detection at time of onset, on data from Bakersfield Heart Hospital (BHH, left) and Stanford Medical Center (right).

**Supplementary Table 5.** Comparison of performance metrics for *InSight* and rules-based methods for severe sepsis detection at time of onset on data from Stanford Medical Center. LR: Likelihood ratio; SIRS: Systemic Inflammatory Response Syndrome; MEWS: Modified Early Warning Score; SOFA: Sequential (Sepsis-Related) Organ Failure Assessment; qSOFA: Quick SOFA.

| <b>Stanford</b> | <b><i>InSight</i></b> | <b>SIRS</b> | <b>MEWS</b> | <b>SOFA</b> | <b>qSOFA</b> |
|-----------------|-----------------------|-------------|-------------|-------------|--------------|
| AUROC           | 0.924                 | 0.710       | 0.786       | 0.836       | 0.836        |
| Sensitivity     | 0.798                 | 0.798       | 0.791       | 0.802       | 0.802        |
| Specitivity     | 0.901                 | 0.901       | 0.731       | 0.744       | 0.744        |
| Accuracy        | 0.900                 | 0.900       | 0.885       | 0.789       | 0.789        |
| LR+             | 8.253                 | 8.253       | 2.940       | 3.133       | 3.133        |
| LR-             | 0.224                 | 0.224       | 0.286       | 0.266       | 0.266        |

**Supplementary Table 6.** Comparison of performance metrics for *InSight* and rules-based methods for severe sepsis detection at time of onset on data from Bakersfield Heart Hospital (BHH). LR: Likelihood ratio; SIRS: Systemic Inflammatory Response Syndrome; MEWS: Modified Early Warning Score; SOFA: Sequential (Sepsis-Related) Organ Failure Assessment; qSOFA: Quick SOFA.

| <b>BHH</b>  | <b><i>InSight</i></b> | <b>SIRS</b> | <b>MEWS</b> | <b>SOFA</b> | <b>qSOFA</b> |
|-------------|-----------------------|-------------|-------------|-------------|--------------|
| AUROC       | 0.945                 | 0.678       | 0.707       | 0.869       | 0.665        |
| Sensitivity | 0.875                 | 0.561       | 0.927       | 0.854       | 0.366        |
| Specitivity | 0.940                 | 0.764       | 0.194       | 0.820       | 0.964        |
| Accuracy    | 0.963                 | 0.957       | 0.851       | 0.940       | 0.977        |
| LR+         | 58.94                 | 2.373       | 1.150       | 4.736       | 10.27        |
| LR-         | 0.129                 | 0.574       | 0.378       | 0.179       | 0.658        |

**Supplementary Table 7.** Comparison of performance metrics for *InSight* and rules-based methods for severe sepsis detection at time of onset on data from Oroville Hospital. LR: Likelihood ratio; SIRS: Systemic Inflammatory Response Syndrome; MEWS: Modified Early Warning Score; SOFA: Sequential (Sepsis-Related) Organ Failure Assessment; qSOFA: Quick SOFA.

| Oroville    | <i>InSight</i> | SIRS  | MEWS  | SOFA  | qSOFA |
|-------------|----------------|-------|-------|-------|-------|
| AUROC       | 0.983          | 0.708 | 0.792 | 0.938 | 0.731 |
| Sensitivity | 0.806          | 0.602 | 0.685 | 0.778 | 0.537 |
| Specitivity | 0.989          | 0.757 | 0.811 | 0.926 | 0.921 |
| Accuracy    | 0.971          | 0.909 | 0.883 | 0.917 | 0.914 |
| LR+         | 77.92          | 2.476 | 3.616 | 10.52 | 6.836 |
| LR-         | 0.197          | 0.526 | 0.388 | 0.240 | 0.502 |

**Supplementary Table 8.** Comparison of performance metrics for *InSight* and rules-based methods for severe sepsis detection at time of onset on data from Cape Regional Medical Center (CRMC). LR: Likelihood ratio; SIRS: Systemic Inflammatory Response Syndrome; MEWS: Modified Early Warning Score; SOFA: Sequential (Sepsis-Related) Organ Failure Assessment; qSOFA: Quick SOFA.

| CRMC        | <i>InSight</i> | SIRS  | MEWS  | SOFA  | qSOFA |
|-------------|----------------|-------|-------|-------|-------|
| AUROC       | 0.960          | 0.732 | 0.554 | 0.749 | 0.560 |
| Sensitivity | 0.802          | 0.591 | 0.478 | 0.631 | 0.155 |
| Specitivity | 0.946          | 0.864 | 0.567 | 0.831 | 0.965 |
| Accuracy    | 0.931          | 0.860 | 0.826 | 0.866 | 0.855 |
| LR+         | 16.85          | 4.346 | 1.104 | 3.739 | 4.470 |
| LR-         | 0.210          | 0.473 | 0.921 | 0.444 | 0.875 |
